# Supplementary material for: Fabrication of core–multishell MWCNT/Fe3O4/PANI/Au hybrid nanotubes with high-performance electromagnetic absorption
Source: Royal Society of Chemistry journal article supplement (doi:10.1039/c5ta01973g), 2015-01-01
Supplement: c5ta01973g1.pdf [file c5ta01973g1.pdf]

**Supporting Informations:**

**Fabrication of Core-Multishell  
MWCNT/Fe<sub>3</sub>O<sub>4</sub>/PANI/Au Hybrid Nanotubes with  
High-Performance Electromagnetic Absorption**

Chenyu Liu,<sup>a</sup> Yongjun Xu,<sup>a</sup> Lina Wu,<sup>b</sup> Zhaohua Jiang,<sup>a</sup> Baozhong Shen<sup>b</sup> and Zhijiang Wang<sup>a,\*</sup>

<sup>a</sup> School of Chemical Engineering and Technology, State Key Laboratory of Urban Water Resource and Environment, Harbin Institute of Technology, Harbin 150001, China.

<sup>b</sup> Department of Medical Imaging and Nuclear Medicine, the 4th Affiliated Hospital, Harbin Medical University, Harbin 150001, China.

**Corresponding Author**

\*Tel: +86-451-86418409. E-mail: [wangzhijiang@hit.edu.cn](mailto:wangzhijiang@hit.edu.cn).

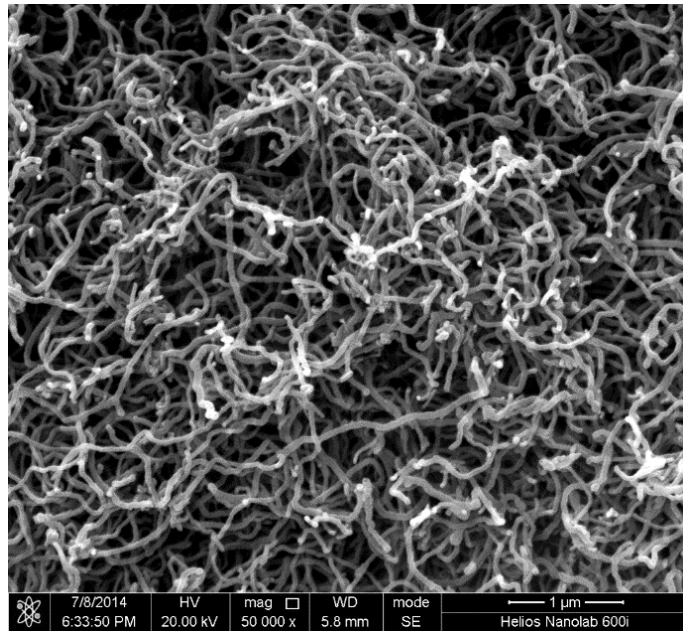

Figure S1. SEM image of MWCNTs.

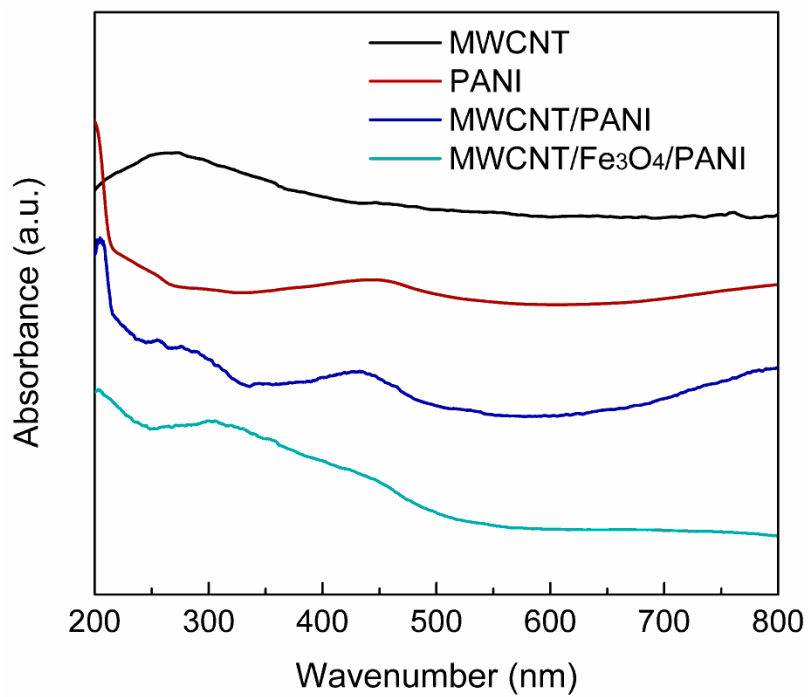

Figure S2. UV-Vis spectra of MWCNT, PANI, MWCNT/PANI, and MWCNT/Fe<sub>3</sub>O<sub>4</sub>/PANI.

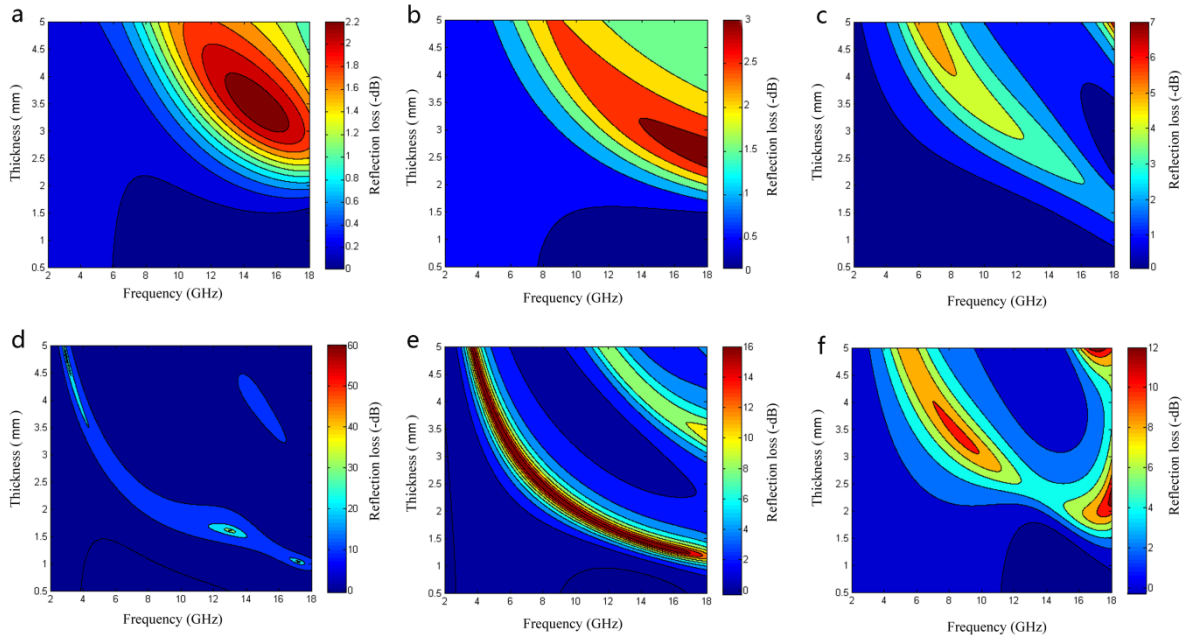

Figure S3. EM wave absorption characteristics of MWCNT/Fe<sub>3</sub>O<sub>4</sub>/PANI/Au composites with loadings of (a) 10 wt%, (b) 20 wt %, (c) 30 wt %, (d) 40 wt %, (e) 50 wt %, (f) 60 wt %.
